# Supplementary material
Source: publisher figshare collection journal article supplement (https://frontiersin.figshare.com/ndownloader/files/24498506)
Supplement: Supplementary file [file 24498506]

# Comorbidity networks in cardiovascular diseases (Supplementary Appendix 2)

Héctor A. Cruz-Ávila<sup>1,2</sup>, Maite Vallejo<sup>2</sup>, Mireya Martínez-García<sup>2</sup>, and Enrique Hernández-Lemus<sup>3,4,\*</sup>

<sup>1</sup> *Autonomous University of México City, México*

<sup>2</sup> *Sociomedical Research Unit, National Institute of Cardiology 'Ignacio Chávez', México*

<sup>3</sup> *Computational Genomics Division, National Institute of Genomic Medicine (INMEGEN), México*

<sup>4</sup> *Centro de Ciencias de la Complejidad, Universidad Nacional Autónoma de México, 04510 Mexico City, Mexico*

Correspondence\*:

**Enrique Hernández-Lemus**

ehernandez@inmegen.gob.mx

## FUNDAMENTALS OF NETWORK THEORY

### 2 Definitions

3 In this appendix we will introduce some general definitions for concepts in network theory and analysis  
4 that may be useful.

### 5 **Degree, Degree centrality**

6 Degree centrality or simply degree is defined as the number  $k_i$  of links incident on a node  $i$  (i.e., the  
7 number of ties that a node has). The degree measures the flow of information through this node in the  
8 network. In the case of a directed network two separate degree centralities are defined, in-degree  $k_i^{in}$   
9 and out-degree  $k_i^{out}$ . Accordingly, in-degree is a measure of the number of links directed to the node  
10 and outdegree is the number of links that such node directs to others. The total number of links  $L$  of an  
11 undirected network is simply:

$$L = \frac{1}{2} \sum_{i=1}^N k_i \quad (1)$$

### 12 **Average degree**

13 Average degree is simply the mean number of connections of the elements of a given network. It provides  
14 a sense of the typical connectivity of the network. It also allows the determination of families of network  
15 types via their degree distribution around the mean.

$$\langle k \rangle = \frac{1}{N} \sum_{i=1}^N k_i = \frac{2L}{N} \quad (2)$$

## 16 **Degree distribution**

17 It is the probability distribution of the number of connections per node in a given network. This is  
 18 an extremely relevant mathematical object since different types of distributions will induce or represent  
 19 different behaviors of the network.

20 For a network with  $N$  nodes the degree distribution is given by:

$$p_k = \frac{N_k}{N}, \quad \text{subject to } \sum_{k=1}^{\infty} p_k = 1 \quad (3)$$

21 With  $N_k$ , the number of nodes having exactly  $k$  links.  
 22

23 From equation 3 it can be noticed that the average degree of a network is given by:

$$\langle k \rangle = \sum_{k=0}^{\infty} k p_k \quad (4)$$

24 Or, more commonly, in real networks with a maximum number of connections  $k_{max}$ :

$$\langle k \rangle = \sum_{k=0}^{k_{max}} k p_k \quad (5)$$

25 If the distribution is homogeneous (all nodes are equally connected) there is no relevant node, this  
 26 is similar to having a random (e.g. normal) distribution in which *most* nodes are similarly connected.  
 27 In contrast, in *long tail* distributions such as scale-free networks, there is a large difference among the  
 28 connectivity of the least and most- connected nodes. Such highly-connected nodes, known as *hubs* will be  
 29 quite relevant for the establishment of the main mathematical properties of the network, hence on their  
 30 biological features.

## 31 **Shortest path**

32 A shortest or geodesic path, between two nodes in a network is a trajectory with the minimum number of  
 33 edges. If the network edges are weighted, it is a path with the minimum sum of edge weights. The length of  
 34 a geodesic path is called geodesic distance or shortest distance. Geodesic paths are not necessarily unique,  
 35 but the shortest path distance is well-defined since all shortest paths have the same length. The shortest  
 36 path is often called the distance between nodes  $i$  and  $j$ , and is denoted by  $d_{ij}$

## 37 **Connectedness**

38 In graph and network theory, the concept of connectedness or *topological connectedness* is often used. In  
 39 topology, a topological space is *connected* if it cannot be formed as the union of two disjoint nonempty  
 40 open sets. In terms of networks, a network is connected if every pair of nodes in the graph is joined by a  
 41 path. A network is said to be fully connected if it consists in only one *island*. A network is connected if  
 42 there is a path connecting every pair of nodes  $i$  and  $j$ , hence there is a finite  $d_{ij}$ . Two nodes are disconnected  
 43 (thus disconnecting the whole network) if such a path does not exist, in which case we have  $d_{ij} = \infty$

## 44 **Clustering coefficient**

45 In network theory a measure of connectedness is the clustering coefficient that represents the degree to  
46 which nodes in a graph are clustered. For a node  $i$  with degree  $k_i$  the *local clustering coefficient* is given by:

$$C_i = \frac{2 L_i}{k_i (k_i - 1)} \quad (6)$$

47  
48  
49 Here  $L_i$  is the number of links between the  $k_i$  neighbors of node  $i$ .  $C_i$  is normalized and thus can be  
50 interpreted as the average probability that two nodes,  $j$  and  $k$ , connected to node  $i$  are in turn directly  
51 connected to each other. The local clustering coefficient is thus a measure of link density. A densely  
52 connected neighborhood will have a larger clustering coefficient.

53  
54 The global clustering coefficient is the average local clustering coefficient for all nodes in a network, i.e.:

$$\langle C \rangle = \frac{1}{N} \sum_{i=1}^N C_i \quad (7)$$

## 55 **Random network**

56 A random network is a collection of  $N$  nodes in which a link between two nodes exists with probability  $p$ .  
57 It can be defined in two mostly equivalent ways.  $N$  labeled nodes are connected with  $L$  randomly placed  
58 links, this is usually called a  $G(N, L)$  model or Erdős and Rényi or fixed links model. You can also build  
59 a random network by having the  $N$  nodes connected with a constant probability  $p$ , called a  $G(N, p)$  or  
60 Gilbert model.

61  
62 The mean degree of a random network is given as:

$$\langle k^{random} \rangle = \frac{2 \langle L \rangle}{N} = p(N - 1) \quad (8)$$

63 Notice that equation 8 as compared to equation 4 reveals the effect of the average probability  $p$  as  
64 representative for the distribution  $p_k$ . Careful analysis of most real networks has revealed however, that  
65 most of them do not actually follow such random behavior (that has been extremely useful both in the  
66 theoretical conceptualization and applications) but they present structural diversity. This fact leads to the  
67 proposal of a number of models, the most relevant of which is perhaps the so-called scale free networks.

## 68 **Scale free networks**

69 The analysis of the empirical degree distribution in a large number of naturally-occurring (as well as in  
70 social and technological) networks is, in a good approximation, described by a power-law equation (see  
71 Equation 9) in which, the probability of nodes having more and more links become bounded, diminishing  
72 depending on the value of the exponent  $\gamma$ .

$$p_k = \alpha k^{-\gamma} \quad (9)$$

73 The constant  $\alpha$  is determined via the normalization condition  $\sum_k p_k = 1$ , thus:

$$\alpha = \frac{1}{\sum_{k=1}^{\infty} k^{-\gamma}} = \frac{1}{\zeta(\gamma)} \quad (10)$$

74 Here  $\zeta$  is Riemann's zeta function. In view of this, a major difference between a random and a scale-free  
75 network lies in the high  $k$ -value tail of the degree distribution  $p_k$ .

## 76 **Degree correlations**

77 An interesting phenomenon that arises in broad degree distributed networks such as scale-free networks  
78 lies in the way highly connected nodes, or hubs are connected in the network. These connectivity patterns  
79 induce the so-called degree correlations that in turn led to three different types of behaviors of networks.  
80 Networks are *assortative* whenever similarly connected nodes tend to connect with each other (hubs  
81 with other hubs and less-connected nodes among themselves). In the contrary case (hubs tend to link to  
82 less-connected nodes and viceversa) the networks are called *disassortative*. If none of these behaviors is  
83 *evident* (i.e. statistically significant), networks are called *neutral*.

## 84 **Robustness**

85 Networks are known to play central roles in the development of robustness in biological systems. Cellular  
86 robustness for instance is currently understood to be encoded by an intricate tangle of regulatory, signaling  
87 and metabolic networks.

89 It is known, that the structure of the underlying network plays a role in a system's ability to survive attacks  
90 on the form of either random failures or specific *insults*. Networks are also involved in the emergence of  
91 cascading failures, that constitute a damage mechanism often found in actual biological systems.

## 92 **Community structure**

93 A network community or *module* is defined as a set of nodes within a network that have a higher likelihood  
94 of (intra-)connection to each other than to (inter-) connection with nodes from other communities (see  
95 *Modules*).

## 96 **Spreading phenomena**

97 A relevant application of the concepts of network science in biology is related to flow (of matter, energy  
98 or, more generally information) within a network. The mass and energy fluxes on a metabolic network or  
99 the spreading of disease in a networked population are both cases of spreading phenomena on a network.  
100 The recent rise of the COVID-19 pandemic has without doubt left a lasting impression upon most of us  
101 regarding the extraordinary efficiency of the world wide *network of human contacts* (even incidental ones)  
102 to act as chains of transmission. The concepts of *critical percolation limit* and *epidemic threshold* have  
103 been developed to analyze the phenomenon of information super-spreading on networks.

**104 Component**

105 A network component, often called a connected component or island, in an undirected network is a  
106 subgraph (a part of the network) in which any two nodes are connected to each other by one or more paths,  
107 and which is connected to no additional nodes in the supergraph (the full network).

**108 Edge Betweenness**

109 or Edge Betweenness Centrality is a centrality measure for the links, it is defined as the number of  
110 shortest paths that go through a given link in a network.

**111 Giant Connected Component (GCC)**

112 A giant connected component is a connected component of a given network that contains a significant  
113 fraction (more than 50 %) of the nodes of the network.

**114 Module**

115 Network modules (also called Communities) are understood as subnetworks formed by sets of nodes (or  
116 vertices) that are more densely connected among themselves than with the rest of the network. Modules are  
117 often viewed as semi-autonomous (but not independent) components of a network that are responsible for  
118 functionality in real networks.

119

120 Network modules play a relevant role in the way we understand specific biological functions as they are  
121 encoded in biomolecular networks. The modularity approach tries to analyze how nodes form functional  
122 modules associated to similar features.
